# Supplementary material
Source: PubMed Central journal article supplement (PMC7226855)
Supplement: ao9b04178_si_001.pdf [file ao9b04178_si_001.pdf]

# Supporting Information

## Evaluation of the novel antimicrobial BCP3 in a coating for endotracheal tubes

*Berkay Ozcelik<sup>1†</sup>, Paul Pasic<sup>1</sup>, Parveen Sangwan<sup>1</sup>, Cheang Ly Be<sup>1</sup>, Veronica Glattauer<sup>1</sup>,  
Helmut Thissen<sup>1\*</sup>, Ramiz A. Boulos<sup>2\*</sup>*

<sup>1</sup> Commonwealth Scientific and Industrial Research Organisation (CSIRO) Manufacturing,  
Clayton, Victoria 3168, Australia.

<sup>2</sup> Boulos & Cooper Pharmaceuticals Pty. Ltd. 16/45 Delawney Street, Balcatta, Western  
Australia 6021, Australia.

**Supplementary Table S1:** BCP3 MIC\* values for MSSA, MRSA and *P. aeruginosa*.

| <b>Bacterial strain</b> | <b>MIC (µg/mL)</b> |
|-------------------------|--------------------|
| MRSA                    | 15.6               |
| MSSA                    | 15.6               |
| <i>P. aeruginosa</i>    | > 1000             |

\*lowest concentration at which greater than 90 % inhibition of bacterial growth was observed.
